# Supplementary material for: Diet is not the primary driver of bacterial community structure in the gut of litter-feeding cockroaches
Source: PubMed Central journal article supplement (PMC6864750; doi:10.1186/s12866-019-1601-9), 2019-10-30
Supplement: 12866_2019_1601_MOESM1_ESM.pdf [file 12866_2019_1601_MOESM1_ESM.pdf]

## Supplementary Figures

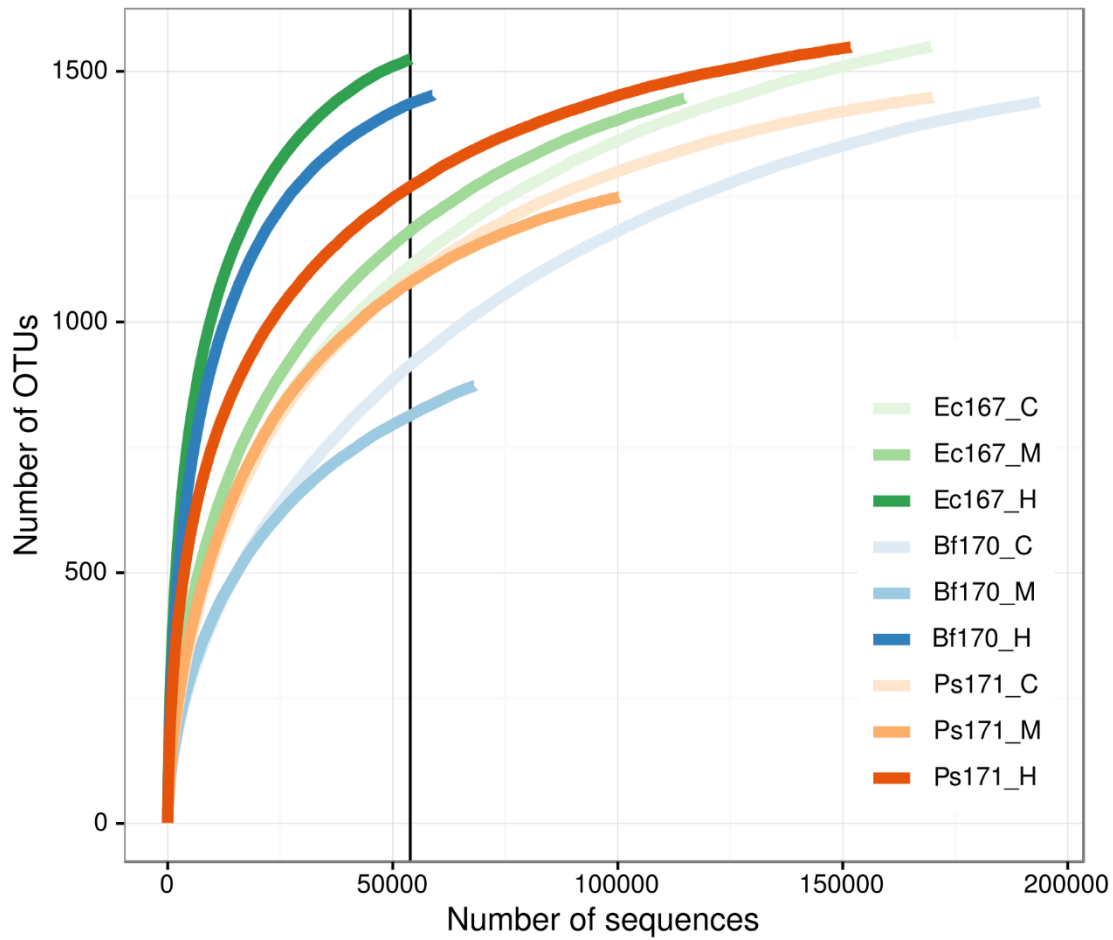

Figure S1 | Species richness as function of sequence depth for the nine gut samples. Each curve represents the number of identified OTUs (97% sequence similarity) as a function of the number of sequenced reads after quality filtering. The vertical line indicates the minimum number of reads to which all samples were subsampled.
